# Supplementary material for: The gene expression profiling of hepatocellular carcinoma by a network analysis approach shows a dominance of intrinsically disordered proteins (IDPs) between hub nodes
Source: Royal Society of Chemistry journal article supplement (doi:10.1039/c5mb00434a), 2015-08-12
Supplement: c5mb00434a1.pdf [file c5mb00434a1.pdf]

**S1 Table.** Top 30 degree nodes in the HCV network. We report the list of the up-regulated (in red) and down-regulated (in green) genes, and the values for average shortest path length, betweenness centrality, closeness centrality, and degree.

| <b>Genes</b>    | <b>Avg. Shortest Path Length</b> | <b>Betweenness Centrality</b> | <b>Closeness Centrality</b> | <b>Degree</b> |
|-----------------|----------------------------------|-------------------------------|-----------------------------|---------------|
| <b>CUL3</b>     | 2.220269                         | 0.082578                      | 0.450396                    | 238           |
| <b>FN1</b>      | 2.19918                          | 0.08896                       | 0.454715                    | 195           |
| <b>KIAA0101</b> | 2.314587                         | 0.049322                      | 0.432043                    | 175           |
| <b>EEF1A1</b>   | 2.200937                         | 0.048319                      | 0.454352                    | 169           |
| <b>COP5</b>     | 2.322789                         | 0.03982                       | 0.430517                    | 153           |
| <b>CAND1</b>    | 2.364382                         | 0.02612                       | 0.422944                    | 137           |
| <b>YWHAZ</b>    | 2.262449                         | 0.034463                      | 0.441999                    | 135           |
| <b>FBXO6</b>    | 2.367897                         | 0.051798                      | 0.422316                    | 132           |
| <b>EGFR</b>     | 2.347393                         | 0.050513                      | 0.426004                    | 124           |
| <b>RPA2</b>     | 2.360281                         | 0.023919                      | 0.423678                    | 108           |
| <b>PCNA</b>     | 2.35618                          | 0.026809                      | 0.424416                    | 105           |
| <b>ITGA4</b>    | 2.418278                         | 0.017328                      | 0.413517                    | 104           |
| <b>RPA1</b>     | 2.421793                         | 0.015475                      | 0.412917                    | 99            |
| <b>CUL2</b>     | 2.421793                         | 0.015302                      | 0.412917                    | 99            |
| <b>YWHAE</b>    | 2.35208                          | 0.026612                      | 0.425156                    | 95            |
| <b>HNRNPC</b>   | 2.388987                         | 0.015527                      | 0.418588                    | 94            |
| <b>ICT1</b>     | 2.783831                         | 0.019037                      | 0.359217                    | 93            |
| <b>POLR2E</b>   | 2.515524                         | 0.00979                       | 0.397531                    | 93            |
| <b>GAPDH</b>    | 2.338606                         | 0.018651                      | 0.427605                    | 92            |
| <b>VCAM1</b>    | 2.489162                         | 0.009337                      | 0.401742                    | 91            |
| <b>YWHAH</b>    | 2.429994                         | 0.015034                      | 0.411524                    | 88            |
| <b>RAN</b>      | 2.449326                         | 0.011179                      | 0.408276                    | 88            |
| <b>RPA3</b>     | 2.472173                         | 0.009155                      | 0.404502                    | 87            |
| <b>EED</b>      | 2.582308                         | 0.016033                      | 0.38725                     | 86            |
| <b>YWHAQ</b>    | 2.379028                         | 0.018004                      | 0.42034                     | 79            |
| <b>DNAJA1</b>   | 2.42355                          | 0.008759                      | 0.412618                    | 79            |
| <b>CUL5</b>     | 2.566491                         | 0.008132                      | 0.389637                    | 75            |
| <b>POLR2I</b>   | 2.719977                         | 0.003487                      | 0.36765                     | 73            |
| <b>FYN</b>      | 2.615114                         | 0.018765                      | 0.382392                    | 72            |
| <b>ATP5B</b>    | 2.428237                         | 0.013093                      | 0.411821                    | 71            |

**S2 Table.** Pathway and molecular function analyses of the HUB genes in the HCV network. We report for each pathway and molecular function name, number of genes, p-values and list of involved genes.

| <b>Pathways</b>                  | <b>Number of genes</b> | <b>P-value</b> | <b>Genes</b>                                           |
|----------------------------------|------------------------|----------------|--------------------------------------------------------|
| Mismatch repair                  | 4                      | 3.03E-04       | RPA1, RPA2, PCNA, RPA3                                 |
| Cancer                           | 9                      | 4.59E-04       | EGFR, CUL2, JUN, RAC1, SMAD4, SMAD2, STAT1, STAT3, FN1 |
| Neurotrophin signaling pathway   | 6                      | 6.95E-04       | YWHAZ, JUN, RAC1, YWHAB, YWHAQ, YWHAE                  |
| Adherens junction                | 5                      | 9.88E-04       | EGFR, FYN, RAC1, SMAD4, SMAD2                          |
| DNA replication                  | 4                      | 1.16E-03       | RPA1, RPA2, PCNA, RPA3                                 |
| <b>Function</b>                  |                        |                |                                                        |
| RNA polymerase activity          | 4                      | 7.54E-05       | POLR2E, RPA1, RPA2, POLR2I                             |
| ubiquitin protein ligase binding | 3                      | 7.66E-03       | CUL5, CUL3, CUL2                                       |
| MAP/ERK kinase kinase activity   | 1                      | 2.72E-02       | EGFR                                                   |

**S3 Table.** Top 30 degree nodes of the HCV-related cirrhosis network. We report for each gene the values for average shortest path length, betweenness centrality, closeness centrality and degree.

| <b>Genes</b>    | <b>Avg. Shortest Path Length</b> | <b>Betweenness Centrality</b> | <b>Closeness Centrality</b> | <b>Degree</b> |
|-----------------|----------------------------------|-------------------------------|-----------------------------|---------------|
| <b>FN1</b>      | 2.137518                         | 0.109989                      | 0.467832                    | 195           |
| <b>YWHAZ</b>    | 2.245416                         | 0.043271                      | 0.445352                    | 141           |
| <b>MDM2</b>     | 2.330748                         | 0.054989                      | 0.429047                    | 135           |
| <b>COPS5</b>    | 2.29055                          | 0.047699                      | 0.436576                    | 127           |
| <b>ACTB</b>     | 2.25952                          | 0.035951                      | 0.442572                    | 126           |
| <b>FBXO6</b>    | 2.370945                         | 0.052309                      | 0.421773                    | 121           |
| <b>MYC</b>      | 2.341326                         | 0.043382                      | 0.427108                    | 109           |
| <b>ITGA4</b>    | 2.354725                         | 0.027465                      | 0.424678                    | 107           |
| <b>HSP90AB1</b> | 2.261636                         | 0.022017                      | 0.442158                    | 105           |
| <b>YWHAB</b>    | 2.430889                         | 0.030047                      | 0.411372                    | 95            |
| <b>CAND1</b>    | 2.440056                         | 0.023655                      | 0.409827                    | 94            |
| <b>YWHAQ</b>    | 2.338505                         | 0.018853                      | 0.427624                    | 93            |
| <b>TUBA1A</b>   | 2.356135                         | 0.020696                      | 0.424424                    | 92            |
| <b>VCAM1</b>    | 2.444288                         | 0.011617                      | 0.409117                    | 90            |
| <b>YWHAE</b>    | 2.368124                         | 0.018286                      | 0.422275                    | 88            |
| <b>FYN</b>      | 2.461918                         | 0.026137                      | 0.406187                    | 88            |
| <b>CUL2</b>     | 2.45275                          | 0.021857                      | 0.407706                    | 86            |
| <b>GAPDH</b>    | 2.327221                         | 0.014744                      | 0.429697                    | 83            |
| <b>RPA1</b>     | 2.480254                         | 0.02393                       | 0.403185                    | 83            |
| <b>RAC1</b>     | 2.488717                         | 0.028028                      | 0.401814                    | 82            |
| <b>PCNA</b>     | 2.381523                         | 0.024509                      | 0.419899                    | 79            |
| <b>XPO1</b>     | 2.45275                          | 0.013865                      | 0.407706                    | 75            |
| <b>RAN</b>      | 2.380113                         | 0.011322                      | 0.420148                    | 74            |
| <b>DDX3X</b>    | 2.375176                         | 0.011382                      | 0.421021                    | 73            |
| <b>JUN</b>      | 2.421721                         | 0.024682                      | 0.41293                     | 73            |
| <b>LCK</b>      | 2.509873                         | 0.021212                      | 0.398427                    | 72            |
| <b>HSPB1</b>    | 2.38646                          | 0.01775                       | 0.419031                    | 71            |
| <b>SMAD2</b>    | 2.503526                         | 0.02234                       | 0.399437                    | 70            |
| <b>CSNK1A1</b>  | 2.469676                         | 0.009932                      | 0.404911                    | 68            |
| <b>VIM</b>      | 2.375882                         | 0.016485                      | 0.420896                    | 67            |

**S4 Table.** Pathway and molecular functions analysis of the HUB genes in the HCV-related cirrhosis network. We report for each pathway and molecular function name, number of genes, p-values and the list of involved genes

| <b>Pathways</b>                                        | <b>Number of genes</b> | <b>P-value</b> | <b>Genes</b>                                                          |
|--------------------------------------------------------|------------------------|----------------|-----------------------------------------------------------------------|
| Cell cycle                                             | 9                      | 6.83E-07       | YWHAZ, YWHAB, YWHAQ, SMAD4, PCNA, MDM2, SMAD2, YWHAE, MYC             |
| Pathogenic infection                                   | 7                      | 1.10E-06       | ACTG1, ACTB, YWHAZ, FYN, YWHAQ, TUBA1A, ITGB1                         |
| Adherens junction                                      | 7                      | 6.56E-06       | ACTG1, ACTB, FYN, RAC1, SMAD4, SMAD2, IQGAP1                          |
| Pathways in cancer                                     | 11                     | 1.95E-05       | HSP90AB1, CUL2, JUN, RAC1, SMAD4, MDM2, SMAD2, STAT1, ITGB1, MYC, FN1 |
| Leukocyte transendothelial migration                   | 6                      | 7.54E-04       | VCAM1, ACTG1, ACTB, RAC1, ITGA4, ITGB1                                |
| Viral myocarditis                                      | 5                      | 9.34E-04       | ACTG1, ACTB, CAV1, FYN, RAC1                                          |
| <b>Function</b>                                        |                        |                |                                                                       |
| DNA regulatory region binding                          | 3                      | 1.77E-02       | JUN, SMAD2, MYC                                                       |
| E-box binding                                          | 1                      | 3.45E-02       | MYC                                                                   |
| Non-membrane spanning protein tyrosine kinase activity | 2                      | 2.26E-02       | FYN, LCK                                                              |
| Promoter binding                                       | 1                      | 2.72E-02       | EGFR                                                                  |
| Phosphoserine binding                                  | 2                      | 9.94E-04       | YWHAB, YWHAE                                                          |

**S5 Table.** Top 30 degree nodes in the HCC with HCV-related cirrhosis network. We report the list of the genes, and the values for average shortest path length, betweenness centrality, closeness centrality and degree.

| <b>Gene Ids</b> | <b>Avg. Shortest Path Length</b> | <b>Betweenness Centrality</b> | <b>Closeness Centrality</b> | <b>Degree</b> |
|-----------------|----------------------------------|-------------------------------|-----------------------------|---------------|
| <b>SUMO2</b>    | 1.935613                         | 0.157188                      | 0.516632                    | 421           |
| <b>SUMO1</b>    | 2.087179                         | 0.075808                      | 0.479115                    | 269           |
| <b>FN1</b>      | 2.129915                         | 0.060845                      | 0.469502                    | 209           |
| <b>KIAA0101</b> | 2.241595                         | 0.027991                      | 0.446111                    | 205           |
| <b>COPS5</b>    | 2.181197                         | 0.037149                      | 0.458464                    | 194           |
| <b>MDM2</b>     | 2.158405                         | 0.033852                      | 0.463305                    | 177           |
| <b>YWHAZ</b>    | 2.132764                         | 0.027914                      | 0.468875                    | 170           |
| <b>CAND1</b>    | 2.230769                         | 0.02352                       | 0.448276                    | 162           |
| <b>FBXO6</b>    | 2.308262                         | 0.035402                      | 0.433226                    | 147           |
| <b>RPA1</b>     | 2.237037                         | 0.019153                      | 0.44702                     | 142           |
| <b>HSP90AB1</b> | 2.150997                         | 0.020266                      | 0.464901                    | 139           |
| <b>PCNA</b>     | 2.194302                         | 0.020286                      | 0.455726                    | 139           |
| <b>CDK1</b>     | 2.19886                          | 0.018056                      | 0.454781                    | 135           |
| <b>HNRNPA1</b>  | 2.221083                         | 0.009007                      | 0.450231                    | 133           |
| <b>HSPD1</b>    | 2.211966                         | 0.01087                       | 0.452087                    | 125           |
| <b>CUL2</b>     | 2.354416                         | 0.013214                      | 0.424734                    | 123           |
| <b>PRKDC</b>    | 2.186895                         | 0.015348                      | 0.457269                    | 121           |
| <b>RAN</b>      | 2.262108                         | 0.008157                      | 0.442065                    | 117           |
| <b>AURKA</b>    | 2.333903                         | 0.012394                      | 0.428467                    | 113           |
| <b>YWHAB</b>    | 2.307692                         | 0.017809                      | 0.433333                    | 111           |
| <b>CTNNB1</b>   | 2.248433                         | 0.024576                      | 0.444754                    | 110           |
| <b>UBR5</b>     | 2.386325                         | 0.009354                      | 0.419054                    | 108           |
| <b>XPO1</b>     | 2.316809                         | 0.008067                      | 0.431628                    | 105           |
| <b>PABPC1</b>   | 2.239316                         | 0.010786                      | 0.446565                    | 102           |
| <b>NPM1</b>     | 2.215385                         | 0.012282                      | 0.451389                    | 99            |
| <b>HNRNPC</b>   | 2.247293                         | 0.004146                      | 0.44498                     | 98            |
| <b>CSNK1A1</b>  | 2.376068                         | 0.008253                      | 0.420863                    | 98            |
| <b>YWHAQ</b>    | 2.292308                         | 0.008742                      | 0.436242                    | 96            |
| <b>CCT3</b>     | 2.299715                         | 0.006029                      | 0.434836                    | 95            |
| <b>RANBP2</b>   | 2.331624                         | 0.011077                      | 0.428886                    | 93            |

**S6 Table.** Pathway and molecular functions analysis of the HUB genes in the HCC with HCV-related cirrhosis network. We report for each pathway and molecular function name, number of genes, p-values and list of involved genes.

| Pathways                                                       | Number of genes | P-Value  | Genes                                                            |
|----------------------------------------------------------------|-----------------|----------|------------------------------------------------------------------|
| acetylation                                                    | 29              | 5.75E-16 | HSP90AB1, XPO1, XRCC6, NEDD8, SF3B3, YBX1, POLR2A, SF3B1,        |
| isopeptide bond                                                | 12              | 3.31E-11 | EGFR, SUMO2, TUBB, CUL5, IKBKG, UBC, PCNA, TP53, NEDD8, CUL1,    |
| phosphoprotein                                                 | 35              | 9.94E-10 | HSP90AB1, XPO1, XRCC6, KIAA0101, YBX1, SRC, POLR2A, SF3B1, CUL5, |
| host-virus interaction                                         | 10              | 5.55E-09 | XPO1, CUL5, FYN, DDB1, RPLP0, IKBKG, TP53, HSPD1, YWHAЕ, SRC     |
| Glycyl lysine isopeptide (Lys-Gly) (interchain ubl conjugation | 9               | 6.93E-09 | EGFR, TUBB, IKBKG, UBC, PCNA, TP53, CUL1, YBX1, CALM1            |
|                                                                | 12              | 2.05E-08 | EGFR, SUMO2, TUBB, CUL5, DDB1, IKBKG, UBC, PCNA, TP53, CUL1,     |
| Cytoplasm                                                      | 23              | 7.52E-08 | HSP90AB1, XPO1, VHL, DDB1, YWHAB, TP53, ILF3, SIRT7, YWHAЕ,      |
| mutagenesis site                                               | 16              | 7.79E-06 | EGFR, XPO1, VHL, DDB1, TP53, KIAA0101, NEDD8, SIRT7, YBX1,       |
| methylation                                                    | 7               | 1.00E-05 | TUBB, TP53, ILF3, PABPC1, NCL, HNRNPU, CALM1                     |
| nucleus                                                        | 22              | 2.82E-05 | XPO1, VHL, DDB1, XRCC6, KIAA0101, TP53, NEDD8, ILF3, SIRT7,      |
| Cell cycle                                                     | 7               | 7.16E-05 | YWHAB, YWHAQ, PCNA, TP53, YWHAЕ, MYC, CUL1                       |
| Interaction with phosphoserine on                              | 3               | 8.91E-05 | YWHAB, YWHAQ, YWHAЕ                                              |
| Glycyl lysine isopeptide (Gly-Lys) (interchain                 | 3               | 2.32E-04 | SUMO2, UBC, NEDD8                                                |
| Pathogenic Escherichia coli infection                          | 5               | 3.13E-04 | TUBB, FYN, YWHAQ, TUBA1A, NCL                                    |
| nucleotide-binding                                             | 12              | 4.82E-04 | EGFR, HSP90AB1, IKBKE, TUBB, FYN, XRCC6, RUVBL2, HSPA5,          |
| ubl conjugation pathway                                        | 7               | 5.96E-04 | SUMO2, CUL5, VHL, DDB1, UBD, NEDD8, CUL1                         |
| hsa04722:Neurotrophin signaling pathway                        | 6               | 6.95E-04 | YWHAB, YWHAQ, TP53, SHC1, YWHAЕ, CALM1                           |
| mrna splicing                                                  | 5               | 9.11E-04 | SF3B1, PABPC1, HNRNPU, SF3B3, YBX1                               |
| Telomeres, Telomerase, Cellular Aging, and                     | 4               | 0.001199 | EGFR, XRCC6, TP53, POLR2A                                        |
| atp-binding                                                    | 10              | 0.001331 | EGFR, HSP90AB1, IKBKE, FYN, XRCC6, RUVBL2, HSPA5, HSPD1,         |

|                                  |    |          |                                                              |
|----------------------------------|----|----------|--------------------------------------------------------------|
| ATP                              | 5  | 0.001428 | EGFR, FYN, HSPD1, HNRNPU, SRC                                |
| RNA binding                      | 3  | 0.00154  | RPLP0, UBC, NCL                                              |
| Spliceosome                      | 4  | 0.001977 | SF3B1, PABPC1, HNRNPU, SF3B3                                 |
| mrna processing                  | 5  | 0.002034 | SF3B1, PABPC1, HNRNPU, SF3B3, YBX1                           |
| Oocyte meiosis                   | 5  | 0.003682 | YWHAB, YWHAQ, YWHAЕ, CUL1, CALM1                             |
| dna-binding                      | 11 | 0.004067 | RPL6, DDB1, XRCC6, PCNA, TP53, ILF3, NCL, MYC, HNRNPU, YBX1, |
| tyrosine-specific protein kinase | 3  | 0.004477 | EGFR, FYN, SRC                                               |
| autophosphorylation              | 3  | 0.004662 | EGFR, FYN, SRC                                               |

---

### Functions

|                                  |          |    |                                                                                                   |
|----------------------------------|----------|----|---------------------------------------------------------------------------------------------------|
| Protein binding                  | 3.34E-07 | 31 | HSP90AB1, XPO1, YWHAZ, COPS5, PRKDC, AURKA, CCT3, CTNNB1, CUL2, SUMO2, SUMO1, SMAD2, AURKA, CUL4B |
| Ubiquitin protein ligase binding | 3.34E-07 | 6  | CUL2, SUMO2, SUMO1, SMAD2, AURKA, CUL4B                                                           |
| Enzyme binding                   | 1.42E-05 | 10 | CUL2, SUMO2, SUMO1, YWHAB, MDM2, SMAD2, AURKA, CUL4B, RPA1, PCNA, SMAD2, HSPD1, HNRNPA1, CTNNB1   |
| Structure-specific DNA binding   | 1.53E-05 | 6  | RPA1, PCNA, SMAD2, HSPD1, HNRNPA1, CTNNB1                                                         |
| Transcription factor binding     | 2.18E-04 | 8  | YWHAZ, COPS5, RAN, NPM1, YWHAB, PRKDC, SMAD2, CTNNB1                                              |
| Unfolded protein binding         | 2.08E-03 | 4  | HSP90AB1, NPM1, HSPD1, CCT3                                                                       |
| Single-stranded DNA binding      | 3.42E-03 | 3  | RPA1, HSPD1, HNRNPA1                                                                              |
| I-SMAD binding                   | 3.42E-03 | 2  | SMAD2, CTNNB1                                                                                     |
| Transcription activator activity | 3.42E-03 | 6  | COPS5, RAN, NPM1, CAND1, SMAD2, CTNNB1                                                            |
| R-SMAD binding                   | 3.61E-03 | 2  | SMAD2, CTNNB1                                                                                     |
| Chromatin binding                | 5.71E-03 | 4  | RPA1, RAN, SMAD2, CTNNB1                                                                          |
| Chromatin binding                | 5.71E-03 | 4  | RPA1, RAN, SMAD2, CTNNB1                                                                          |

---

**S7 Table.** Top 30 degree nodes in the HepG2 network. We report for each gene, the values for average shortest path length, betweenness centrality, closeness centrality and degree.

| <b>Genes</b>    | <b>Avg. Shortest Path Length</b> | <b>Betweenness Centrality</b> | <b>Closeness Centrality</b> | <b>Degree</b> |
|-----------------|----------------------------------|-------------------------------|-----------------------------|---------------|
| <b>AURKA</b>    | 2.534137                         | 0.101047                      | 0.394612                    | 45            |
| <b>PCNA</b>     | 2.425703                         | 0.125077                      | 0.412252                    | 39            |
| <b>ACTB</b>     | 2.305221                         | 0.254464                      | 0.433798                    | 35            |
| <b>AURKB</b>    | 2.586345                         | 0.070503                      | 0.386646                    | 35            |
| <b>CDC20</b>    | 2.718876                         | 0.033512                      | 0.367799                    | 27            |
| <b>CSNK2A1</b>  | 2.60241                          | 0.084551                      | 0.384259                    | 25            |
| <b>UBD</b>      | 2.598394                         | 0.124572                      | 0.384853                    | 23            |
| <b>ZWINT</b>    | 2.742972                         | 0.042547                      | 0.364568                    | 21            |
| <b>CCNB1</b>    | 2.791165                         | 0.017372                      | 0.358273                    | 21            |
| <b>MCM6</b>     | 2.678715                         | 0.023469                      | 0.373313                    | 20            |
| <b>H2AFX</b>    | 2.558233                         | 0.059787                      | 0.390895                    | 19            |
| <b>SRC</b>      | 2.658635                         | 0.064603                      | 0.376133                    | 19            |
| <b>MCM3</b>     | 2.742972                         | 0.018468                      | 0.364568                    | 19            |
| <b>CHEK1</b>    | 2.807229                         | 0.020556                      | 0.356223                    | 18            |
| <b>UBE2C</b>    | 2.819277                         | 0.024567                      | 0.354701                    | 18            |
| <b>MAD2L1</b>   | 2.923695                         | 0.038116                      | 0.342033                    | 18            |
| <b>CENPA</b>    | 2.722892                         | 0.031222                      | 0.367257                    | 17            |
| <b>SFN</b>      | 2.751004                         | 0.063396                      | 0.363504                    | 17            |
| <b>RFC4</b>     | 2.919679                         | 0.011052                      | 0.342503                    | 17            |
| <b>CCNA2</b>    | 2.919679                         | 0.006355                      | 0.342503                    | 17            |
| <b>HNRNPA1</b>  | 2.666667                         | 0.040918                      | 0.375                       | 16            |
| <b>CKAP5</b>    | 2.855422                         | 0.007451                      | 0.350211                    | 16            |
| <b>BIRC5</b>    | 2.863454                         | 0.009078                      | 0.349229                    | 16            |
| <b>SERPING1</b> | 3.506024                         | 0.028728                      | 0.285223                    | 16            |
| <b>CDC25C</b>   | 2.835341                         | 0.011002                      | 0.352691                    | 15            |
| <b>HLA-B</b>    | 2.899598                         | 0.048343                      | 0.344875                    | 15            |
| <b>KIF2C</b>    | 3.02008                          | 0.001272                      | 0.331117                    | 15            |
| <b>MCM4</b>     | 2.967871                         | 0.005485                      | 0.336942                    | 14            |
| <b>SPC24</b>    | 2.987952                         | 0.012456                      | 0.334677                    | 13            |
| <b>INCENP</b>   | 3.008032                         | 0.004193                      | 0.332443                    | 13            |



**S8 Table.** Pathway and molecular functions analysis of the HUB genes in the HepG2 network. We report for each pathway and molecular function name, number of genes, p-values and list of involved genes

| <b>Pathways</b>                                  | <b>Number of genes</b> | <b>P- Value</b> | <b>Genes</b>                                                                                                                                                                                                   |
|--------------------------------------------------|------------------------|-----------------|----------------------------------------------------------------------------------------------------------------------------------------------------------------------------------------------------------------|
| Cell cycle                                       | 11                     | 1.58E-11        | CCNB1, MAD2L1, PCNA, CHEK1, CDC20, SFN, MCM3, CDC25C, MCM4, CCNA2, MCM6                                                                                                                                        |
| DNA replication                                  | 5                      | 1.16E-05        | RFC4, PCNA, MCM3, MCM4, MCM6                                                                                                                                                                                   |
| Oocyte meiosis                                   | 5                      | 9.34E-04        | CCNB1, MAD2L1, CDC20, AURKA, CDC25C                                                                                                                                                                            |
| Progesterone-mediated oocyte maturation          | 4                      | 0.004985        | CCNB1, MAD2L1, CDC25C, CCNA2                                                                                                                                                                                   |
| How Progesterone Initiates the Oocyte Maturation | 3                      | 0.007749        | CCNB1, CDC25C, SRC                                                                                                                                                                                             |
| p53 signaling pathway                            | 3                      | 0.031419        | CCNB1, CHEK1, SFN                                                                                                                                                                                              |
| Adherence junction                               | 3                      | 0.039471        | ACTB, CSNK2A1, SRC                                                                                                                                                                                             |
| <b>Functions</b>                                 |                        |                 |                                                                                                                                                                                                                |
| Protein binding                                  | 5.52E-07               | 30              | PCNA, SRC, CENPA, AURKB, ACTB, AURKA, CDC20, CCNB1, UBD, CHEK1, SFN, HNRNPA1, RFC4, CSNK2A1, UBE2C, H2AFX, HLA-B, CDC25C, CKAP5, ZWINT, CCNA2, INCENP, MCM3, SERPING1, MCM4, BIRC5, KIF2C, MCM6, SPC24, MAD2L1 |
| ATP binding                                      | 4.73E-04               | 12              | RFC4, CSNK2A1, SRC, UBE2C, CHEK1, MCM3, MCM4, KIF2C, MCM6, AURKB, ACTB, AURKA                                                                                                                                  |
| Nucleotide binding                               | 1.76E-03               | 13              | RFC4, CSNK2A1, SRC, UBE2C, AURKB, ACTB, AURKA, CHEK1, MCM3, MCM4, KIF2C, MCM6, HNRNPA1                                                                                                                         |
| Single-stranded DNA binding                      | 1.76E-03               | 3               | MCM4, MCM6, HNRNPA1                                                                                                                                                                                            |
| Structure-specific DNA binding                   | 1.82E-03               | 4               | PCNA, MCM4, MCM6, HNRNPA1                                                                                                                                                                                      |
| Protein kinase activity                          | 6.83E-03               | 6               | CCNB1, CSNK2A1, SRC, CHEK1, AURKB, AURKA                                                                                                                                                                       |
| Protein complex binding                          | 1.04E-02               | 4               | CCNB1, PCNA, SRC, UBD                                                                                                                                                                                          |
| Enzyme binding                                   | 1.04E-02               | 6               | CDC20, CCNB1, H2AFX, BIRC5, ACTB, AURKA                                                                                                                                                                        |

|                                                                 |          |   |                                          |
|-----------------------------------------------------------------|----------|---|------------------------------------------|
| Phosphotransferase activity, alcohol group as acceptor          | 1.29E-02 | 6 | CCNB1, CSNK2A1, SRC, CHEK1, AURKB, AURKA |
| DNA polymerase processivity factor activity                     | 1.29E-02 | 1 | PCNA                                     |
| DNA helicase activity                                           | 1.59E-02 | 2 | MCM4, MCM6                               |
| Kinase activity                                                 | 1.59E-02 | 6 | CCNB1, CSNK2A1, SRC, CHEK1, AURKB, AURKA |
| DNA insertion or deletion binding                               | 2.07E-02 | 1 | PCNA                                     |
| Protein kinase C inhibitor activity                             | 2.07E-02 | 1 | SFN                                      |
| protein kinase binding                                          | 2.37E-02 | 3 | CCNB1, ACTB, AURKA                       |
| MutLalpha complex binding                                       | 2.76E-02 | 1 | PCNA                                     |
| Cobalt ion binding                                              | 2.76E-02 | 1 | BIRC5                                    |
| Transferase activity, transferring phosphorus-containing groups | 2.76E-02 | 6 | CCNB1, CSNK2A1, SRC, CHEK1, AURKB, AURKA |
| Kinase binding                                                  | 3.20E-02 | 3 | CCNB1, ACTB, AURKA                       |
| Microtubule binding                                             | 3.20E-02 | 2 | BIRC5, KIF2C                             |
| Mismatch repair complex binding                                 | 3.22E-02 | 1 | PCNA                                     |

---

**S9 Table.** Top 30 degree nodes in the HepG2 1<sup>st</sup> order network. We report for each gene the values for average shortest path length, betweenness centrality, closeness centrality and degree.

| <b>Names</b>    | <b>Avg. Shortest Path Length</b> | <b>Betweenness centrality</b> | <b>Closeness centrality</b> | <b>Degree</b> |
|-----------------|----------------------------------|-------------------------------|-----------------------------|---------------|
| <b>UBC</b>      | 1.25276583                       | 0.48018962                    | 0.798234                    | 4915          |
| <b>SUMO2</b>    | 1.86432084                       | 0.01499912                    | 0.536388                    | 1274          |
| <b>NRF1</b>     | 1.90027658                       | 0.02017872                    | 0.526239                    | 1100          |
| <b>APP</b>      | 1.9016595                        | 0.02283228                    | 0.525857                    | 961           |
| <b>CUL3</b>     | 1.92393977                       | 0.00691475                    | 0.519767                    | 950           |
| <b>ELAVL1</b>   | 1.91994468                       | 0.01468349                    | 0.520848                    | 927           |
| <b>SUMO1</b>    | 1.93054702                       | 0.00777348                    | 0.517988                    | 859           |
| <b>TP53</b>     | 1.93039336                       | 0.00781566                    | 0.518029                    | 829           |
| <b>HSP90AA1</b> | 1.92178857                       | 0.00745078                    | 0.520349                    | 823           |
| <b>FN1</b>      | 1.93484942                       | 0.01164406                    | 0.516836                    | 798           |
| <b>CDK2</b>     | 1.95282729                       | 0.00402974                    | 0.512078                    | 741           |
| <b>EEF1A1</b>   | 1.95574677                       | 0.00374308                    | 0.511314                    | 733           |
| <b>ESR1</b>     | 1.95190535                       | 0.00468021                    | 0.51232                     | 727           |
| <b>YWHAZ</b>    | 1.94698832                       | 0.00468332                    | 0.513614                    | 721           |
| <b>KIAA0101</b> | 1.98217578                       | 0.00269152                    | 0.504496                    | 692           |
| <b>CUL1</b>     | 1.9738783                        | 0.00289177                    | 0.506617                    | 687           |
| <b>MDM2</b>     | 1.96511985                       | 0.00356405                    | 0.508875                    | 658           |
| <b>GRB2</b>     | 1.96097111                       | 0.00748759                    | 0.509951                    | 647           |
| <b>COPS5</b>    | 1.97449293                       | 0.00354007                    | 0.506459                    | 646           |
| <b>CSNK2A1</b>  | 1.96588814                       | 0.00675211                    | 0.508676                    | 645           |
| <b>UBD</b>      | 1.99861709                       | 0.00961494                    | 0.500346                    | 644           |

|              |            |            |          |     |
|--------------|------------|------------|----------|-----|
| <b>HSPA5</b> | 1.95267363 | 0.00282914 | 0.512118 | 642 |
| <b>HSPA8</b> | 1.95789797 | 0.00293833 | 0.510752 | 617 |
| <b>NEDD8</b> | 1.98417333 | 0.00347169 | 0.503988 | 614 |
| <b>SRC</b>   | 1.97080516 | 0.00820955 | 0.507407 | 606 |
| <b>ACTB</b>  | 1.96204671 | 0.00587068 | 0.509672 | 594 |
| <b>CAND1</b> | 2.01275353 | 0.00226339 | 0.496832 | 587 |
| <b>MYC</b>   | 1.98862938 | 0.00362258 | 0.502859 | 580 |
| <b>TUBB</b>  | 1.96757837 | 0.0019447  | 0.508239 | 574 |
| <b>SIRT7</b> | 2.08113092 | 0.00212305 | 0.480508 | 571 |

**S10 Table.** The 84 interacting hub genes from the Venn diagram of Fig 6 with symbols and acronyms.

| <b>Gene Symbols</b> | <b>Gene Name</b>                                                                      | <b>Gene Symbols</b> | <b>Gene Name</b>                                                               |
|---------------------|---------------------------------------------------------------------------------------|---------------------|--------------------------------------------------------------------------------|
| ACTB                | actin, beta                                                                           | ITGA4               | integrin, alpha 4 (antigen CD49D, alpha 4 subunit of VLA-4 receptor)           |
| ATP5B               | ATP Synthase, H <sup>+</sup> Transporting, Mitochondrial F1 Complex, Beta Polypeptide | JUN                 | Jun Proto-Oncogene                                                             |
| AURKA               | aurora kinase A                                                                       | KIAA0101            | PCNA- associated factor of 15KDa (PAF)                                         |
| AURKB               | aurora kinase B                                                                       | KIF2C               | kinesin family member 2C                                                       |
| BIRC5               | baculoviral IAP repeat-containing 5                                                   | LCK                 | lymphocyte-specific protein tyrosine kinase                                    |
| CAND1               | cullin-associated and neddylation-dissociated 1                                       | MAD2L1              | MAD2 mitotic arrest deficient-like 1 (yeast)                                   |
| CCNA2               | cyclin A2                                                                             | MCM3                | minichromosome maintenance complex component 3                                 |
| CCNB1               | cyclin B1                                                                             | MCM4                | minichromosome maintenance complex component 4                                 |
| CCT3                | chaperonin containing TCP1, subunit 3 (gamma)                                         | MCM6                | minichromosome maintenance complex component 6                                 |
| CDC20               | cell division cycle 20 homolog (S. cerevisiae)                                        | MDM2                | Mdm2 p53 binding protein homolog (mouse)                                       |
| CDC25C              | cell division cycle 25 homolog C (S. pombe)                                           | MYC                 | v-MYC avian myelocytomatosis viral oncogene homolog (Transcription Factor P64) |
| CDK1                | cell division cycle 2, G1 to S and G2 to M                                            | NPM1                | nucleophosmin 1 (nucleolar phosphoprotein B23, numatrin)                       |
| CENPA               | centromere protein A                                                                  | PABPC1              | poly(A) binding protein, cytoplasmic 1                                         |
| CHEK1               | checkpoint kinase 1                                                                   | PCNA                | proliferating cell nuclear antigen                                             |

|         |                                                                                           |          |                                                                                         |
|---------|-------------------------------------------------------------------------------------------|----------|-----------------------------------------------------------------------------------------|
| CKAP5   | cytoskeleton associated protein 5                                                         | POLR2E   | polymerase (RNA) II (DNA directed) polypeptide E, 25kDa                                 |
| COPS5   | COP9 constitutive photomorphogenic homolog subunit 5                                      | POLR2I   | polymerase (RNA) II (DNA directed) polypeptide I                                        |
| CSNK1A1 | casein kinase 1, alpha 1                                                                  | PRKDC    | protein kinase, DNA-activated, catalytic polypeptide                                    |
| CSNK2A1 | casein kinase 2, alpha 1 polypeptide pseudogene; casein kinase 2, alpha 1 polypeptide     | RAC1     | ras-related C3 botulinum toxin substrate 1 (rho family, small GTP binding protein Rac1) |
| CTNNB1  | catenin (cadherin-associated protein), beta 1, 88kDa                                      | RAN      | RAN, member RAS oncogene family                                                         |
| CUL2    | cullin-2                                                                                  | RANBP2   | RAN binding protein 2                                                                   |
| CUL3    | cullin-3                                                                                  | RFC4     | replication factor C (activator 1) 4, 37kDa                                             |
| CUL5    | cullin-5                                                                                  | RPA1     | Replication protein A1                                                                  |
| DDX3X   | DEAD (Asp-Glu-Ala-Asp) box helicase 3, X-linked                                           | RPA2     | Replication protein A2                                                                  |
| DNAJA1  | DnaJ (Hsp40) homolog, subfamily A, member 1                                               | RPA3     | Replication protein A3                                                                  |
| EED     | embryonic ectoderm development (WD Protein Associating With Integrin Cytoplasmic Tails 1) | SERPING1 | serpin peptidase inhibitor, clade G (C1 inhibitor), member 1                            |
| EEF1A1  | eukaryotic translation elongation factor 1 alpha 1                                        | SFN      | Stratifin                                                                               |
| EGFR    | Epidermal growth factor receptor                                                          | SMAD2    | SMAD family member 2 (Mothers Against DPP Homolog 2 (Drosophila))                       |
| FBXO6   | F-box protein 6                                                                           | SPC24    | Spindle Pole Body Component 24                                                          |
| FN1     | fibronectin 1                                                                             | SRC      | v-src sarcoma (Schmidt-Ruppin A-2) viral oncogene homolog (avian)                       |

|          |                                                                                                                                                                                                                                                                 |        |                                                                                           |
|----------|-----------------------------------------------------------------------------------------------------------------------------------------------------------------------------------------------------------------------------------------------------------------|--------|-------------------------------------------------------------------------------------------|
| FYN      | Oncogene Related To SRC, FGR, YES(OKT3-Induced Calcium Influx Regulator)                                                                                                                                                                                        | SUMO1  | small ubiquitin-like modifier 1                                                           |
| GAPDH    | glyceraldehyde-3-phosphate dehydrogenase                                                                                                                                                                                                                        | SUMO2  | small ubiquitin-like modifier 2                                                           |
| H2AFX    | H2A histone family, member X                                                                                                                                                                                                                                    | TUBA1A | tubulin, alpha 1a                                                                         |
| HLA-B    | major histocompatibility complex, class I, C; major histocompatibility complex, class I, B                                                                                                                                                                      | UBD    | Ubiquitin D                                                                               |
| HNRNPA1  | heterogeneous nuclear ribonucleoprotein A1-like 3                                                                                                                                                                                                               | UBE2C  | ubiquitin-conjugating enzyme E2C                                                          |
| HNRNPC   | heterogeneous nuclear ribonucleoprotein C (C1/C2)                                                                                                                                                                                                               | UBR5   | ubiquitin protein ligase E3 component n-recognin 5                                        |
| HNRNPM   | heterogeneous nuclear ribonucleoprotein M                                                                                                                                                                                                                       | VCAM1  | vascular cell adhesion molecule 1                                                         |
| HSP90AB1 | heat shock protein 90kDa alpha (cytosolic), class B member 1                                                                                                                                                                                                    | VIM    | vimentin (Epididymis Luminal Protein)                                                     |
| HSPB1    | heat shock 27kDa protein 1                                                                                                                                                                                                                                      | XPO1   | exportin 1 (CRM1 homolog, yeast)                                                          |
| HSPD1    | heat shock 60kDa protein 1 (chaperonin) pseudogene 5; heat shock 60kDa protein 1 (chaperonin) pseudogene 6; heat shock 60kDa protein 1 (chaperonin) pseudogene 1; heat shock 60kDa protein 1 (chaperonin) pseudogene 4; heat shock 60kDa protein 1 (chaperonin) | YWHAB  | tyrosine 3-monooxygenase/tryptophan 5-monooxygenase activation protein, beta polypeptide  |
| ICT1     | immature colon carcinoma transcript 1                                                                                                                                                                                                                           | YWHAE  | tyrosine 3-monooxygenase/tryptophan 5-monooxygenase activation protein, epsilon           |
| INCENP   | inner centromere protein antigens 135/155kDa                                                                                                                                                                                                                    | YWHAQ  | tyrosine 3-monooxygenase/tryptophan 5-monooxygenase activation protein, theta polypeptide |
| ZWINT    | ZW10 interactor                                                                                                                                                                                                                                                 | YWHAZ  | tyrosine 3-monooxygenase/tryptophan 5-monooxygenase activation protein, zeta polypeptide  |





**S11 Table.** Recurrence table of the 84 interacting hub nodes from the Venn diagram of figure 1 for HCV, HCV related cirrhosis, HCC with HCV related cirrhosis and HepG2 networks.

| Names                                                     | Number of genes | Genes                                                                                                                                                                              |
|-----------------------------------------------------------|-----------------|------------------------------------------------------------------------------------------------------------------------------------------------------------------------------------|
| HCC with HCV related Cirrhosis, HCV, HCV Cirrhosis, HepG2 | 1               | PCNA                                                                                                                                                                               |
| HCC with HCV related Cirrhosis, HCV, HCV Cirrhosis        | 10              | COPS5, CAND1, YWHAQ, FBXO6, RPA1, RAN, FN1, CUL2, YWHAB, YWHAZ                                                                                                                     |
| HCC with HCV related Cirrhosis, HepG2                     | 2               | HNRNPA1, AURKA                                                                                                                                                                     |
| HCC with HCV related Cirrhosis, HCV Cirrhosis             | 4               | HSP90AB1, XPO1, MDM2, CSNK1A1                                                                                                                                                      |
| HCC with HCV related Cirrhosis, HCV                       | 1               | KIAA0101                                                                                                                                                                           |
| HCV related Cirrhosis, HepG2                              | 1               | ACTB                                                                                                                                                                               |
| HCV, HCV related Cirrhosis                                | 5               | VCAM1, GAPDH, FYN, YWHAE, ITGA4                                                                                                                                                    |
| HCC with HCV related Cirrhosis                            | 12              | HSPD1, CDK1, CCT3, UBR5, PABPC1, SUMO2, SUMO1, NPM1, CTNNB1, HNRNPC, RANBP2, PRKDC                                                                                                 |
| HepG2                                                     | 26              | CENPA, AURKB, CSNK2A1, MCM3, MCM6, CHEK1, SFN, SERPING1, MCM4, CDC20, KIF2C, BIRC5, ZWINT, CCNB1, CKAP5, SPC24, UBD, INCENP, UBE2C, SRC, MAD2L1, H2AFX, HLA-B, RFC4, CCNA2, CDC25C |
| HCV related cirrhosis                                     | 9               | HSPB1, RAC1, LCK, SMAD2, MYC, JUN, TUBA1A, VIM, DDX3X                                                                                                                              |
| HCV                                                       | 13              | ICT1, RPA2, CUL3, CUL5, EED, DNAJA1, HNRNPM, ATP5B, POLR2I, EGFR, POLR2E, EEF1A1, RPA3                                                                                             |

**S12 Table.** Functional and Molecular properties of the 26 HUB nodes specific for HepG2 as shown in the figure 6. **IDR** = Intrinsically Disordered Region(s), where + = amount of intrinsically disordered region(s) < 15% but not zero; ++ = 15% > IDR < 50%; +++ = IDR > 50%. **INT** = Number of interactions with molecular partners (from BioGrid). **SEQ** = Sequence length (number of amino acids).

| Gene name in Gene Cards | Protein code in UniProtKB/Swiss-Prot | Protein name                       | Biological Function                                                                                                     | IDR | INT | SEQ  |
|-------------------------|--------------------------------------|------------------------------------|-------------------------------------------------------------------------------------------------------------------------|-----|-----|------|
| ZWINT                   | 095229-ZWINT human                   | Zw10- interactor                   | Part of kinetochore complex at pro-metaphase involved in cell division control at chromosome level.                     | +   | 55  | 277  |
| CCNB1                   | P14635-human                         | G2/mitotic-specific-cyclin B1      | Histone kinase activity and control of cell cycle at G2/M (mitosis) transition in cytoplasm (cytoskeleton) and nucleus. | ++  | 89  | 433  |
| CKAP5                   | Q14008 human                         | Cytoskeleton associated protein 5  | Control of mitotic nuclear division by establishing and maintaining of microtubule cytoskeleton polarity.               | +++ | 39  | 2032 |
| SPC24                   | Q8NBT2-SPC24 human                   | Kinetochore protein Spc24          | Kinetochore complex component for chromosome segregation.                                                               | +++ | 31  | 197  |
| COPS5                   | Q92905-CSN5 human                    | COP9 signalosome complex subunit 5 | Part of COP9 nuclear signalosome complex involved in various cellular and developmental processes                       | +   | 792 | 334  |

|        |                    |                                                    |                                                                                                                                                                                     |    |     |      |
|--------|--------------------|----------------------------------------------------|-------------------------------------------------------------------------------------------------------------------------------------------------------------------------------------|----|-----|------|
| CAND1  | Q86VP6 human       | Cullin-associated NEDD8-dissociated protein 1      | Factor of (SKP1-CUL1-F-box protein) E3 ubiquitine ligase complex in cell differentiation control of RNA polymerase II by ubiquitination in nucleus and cytoplasm.                   | +  | 682 | 1229 |
| YWHAQ  | P63104-1433Z human | 14-3-3 protein theta                               | Regulation of a large spectrum of general and specialized signaling in metabolism, protein trafficking, signal transduction, apoptosis, cell cycle regulation in zeta/delta complex | +  | 393 | 245  |
| FBXO6  | Q9NRD1-FBX6 human  | F-box only protein 6                               | Part of FBOX proteins (protein 6) associated degradation for misfolded luminal proteins in ER                                                                                       | +  | 621 | 293  |
| SRC    | P12931-SRC human   | Proto-oncogene tyrosine-protein kinase Src         | Non receptor protein kinase controls gene transcription, immune response, cell adhesion, cell cycle progression, apoptosis, migration and transformation.                           | ++ | 272 | 536  |
| MAD2L1 | Q13257-MD2L1 human | Mitotic spindle assembly check point protein MAD2A | Component of the spindle-assembly check point that controls the proper alignment of chromosomes in anaphase.                                                                        | +  | 48  | 205  |

|        |                        |                                                         |                                                                                                                                                                                                                          |     |     |     |
|--------|------------------------|---------------------------------------------------------|--------------------------------------------------------------------------------------------------------------------------------------------------------------------------------------------------------------------------|-----|-----|-----|
| H2AFX  | P16104-H2AX<br>human   | Histone H2AX                                            | Involved in nucleosome complex wrapping and compacting DNA into chromatin and limiting DNA reading, but also in DNA repair, DNA replication and chromosomal stability at level of G1 and S-phase.                        | +   | 209 | 143 |
| HLA-B  | P01889-1B07<br>human   | HLA class I histocompatibility antigen, B-7 alpha chain | Involved in the presentation of foreign antigens to the immune system                                                                                                                                                    | ++  | 63  | 362 |
| UBD    | O15205-UBD<br>human    | Ubiquitin D                                             | Ubiquitin like protein leading to degradation by 26S proteasome. Among other functions mediates mitotic non-disjunction and chromosome instability by abbreviating mitotic phase and impairing kinetochore localization. | +++ | 667 | 165 |
| INCENP | Q9NQ57-INCENP<br>human | Inner centromere protein                                | Component of the chromosomal passenger complex (CPC), a key regulator of mitosis at centromere in ensuring correct chromosome alignment and segregation required for chromatin-induced microtubule                       | +++ | 17  | 918 |

|        |                     |                                   |                                                                                                                                                                        |     |     |     |
|--------|---------------------|-----------------------------------|------------------------------------------------------------------------------------------------------------------------------------------------------------------------|-----|-----|-----|
|        |                     |                                   | stabilization and spindle assembly.                                                                                                                                    |     |     |     |
| UBE2C  | O00762-UBEC2C human | Ubiquitin-conjugating enzyme E2C. | Accepts ubiquitin from E1 complex and catalyzes its covalent attachment to proteins.                                                                                   | ++  | 59  | 179 |
| RFC4   | P35249-RFC4 human   | Replication factor C subunit 4    | Involved into elongation of primed DNA templates by DNA polymerase delta and epsilon in a complex requiring PCNA, RFC2, RFC3, RFC4 and RFC5                            | +   | 68  | 363 |
| CCNA2  | P20248-CCNA2 human  | Cyclin A2                         | Control of the gene cycle at G1/S (start) and G2/M (mitosis) transitions in complex with CDK1 and CDK2 and is able to interact with human cytomegalovirus protein UL32 | ++  | 89  | 432 |
| CDC25C | P30307-MPIP3 human  | M-phase inducer phosphatase 3     | Key role in the regulation of cell division also suppressing p53 induced growth arrest.                                                                                | +++ | 36  | 473 |
| HSPB1  | P04792-HSPB1 human  | Heat shock protein beta-1         | Induced by stress and environmental changes. It is involved in stress resistance and actin organization also interacting with microtubules.                            | +++ | 114 | 205 |

|       |                    |                                            |                                                                                                                                                                                                                                                                                                                                                                     |     |     |     |
|-------|--------------------|--------------------------------------------|---------------------------------------------------------------------------------------------------------------------------------------------------------------------------------------------------------------------------------------------------------------------------------------------------------------------------------------------------------------------|-----|-----|-----|
| RAC1  | P63000-RCA1 human  | Ras-related C3 botulinum toxin substrate 1 | GTPase of ras superfamily of GTP-binding protein that controls cell growth, cytoskeletal reorganization, activation of protein kinases associated to plasma membrane.                                                                                                                                                                                               | +   | 134 | 192 |
| LCK   | P06239-LCK human   | Tyrosine-protein kinase LCK.               | Non-receptor tyr-prot kinase with a role in the selection and maturation of developing T-cells in thymus and in function of mature T-cells also associated to CD4 and CD8 surface receptors                                                                                                                                                                         | ++  | 85  | 509 |
| SMAD2 | Q15796-SMAD2 human | Mothers against decapentaplegic homolog 2  | It is a signal transducer (receptor regulated SMAD) and transcriptional modulator that mediates multiple signaling pathways also mediate the signal of transforming growth factor (TGF)beta and regulates multiple cellular processes such as proliferation, apoptosis, and differentiation binding TRE in the promoter region of many genes regulated by TGF-beta. | +++ | 259 | 467 |

**S13 Table.** List of up-expressed genes found in HCC with HCV-related cirrhosis and HepG2 (A) and of genes involved in circadian rhythm (B) that can be targets for miR-372.

A)

| HCC with HCV-related cirrhosis | HepG2    |
|--------------------------------|----------|
| AAK1                           | ABR      |
| ADAM9                          | ADORA2B  |
| AEBP2                          | ASF1B    |
| AGGF1                          | BLVRA    |
| AHR                            | C1orf135 |
| AKAP11                         | C9orf58  |
| ANGEL2                         | CDC25A   |
| ANKRD13C                       | CDCA7    |
| ANKRD29                        | CDCA8    |
| ANKRD44                        | CDT1     |
| ANKRD50                        | CLSTN1   |
| ANKRD9                         | DCDC2    |
| APBB2                          | DPYSL2   |
| ARHGAP12                       | E2F2     |
| ARHGAP18                       | FAM57A   |
| ARID4B                         | FANCD2   |
| ASF1A                          | FBLN1    |
| ASH1L                          | FOXRED2  |
| ATAD2                          | GPR44    |
| ATG12                          | HEPACAM  |
| ATP11A                         | ITGA2    |
| ATP6V1D                        | KIF11    |
| ATP8B1                         | KIF23    |
| ATXN1                          | KIF3C    |
| B3GNT5                         | KPNA2    |
| BAMBI                          | M6PRBP1  |
| BCAP29                         | MCM10    |
| BCL10                          | MCM3     |
| BCL2L11                        | MCM4     |
| BCLAF1                         | MCM6     |
| BLVRA                          | NBL1     |
| BLZF1                          | NCAPD2   |
| BMPR1A                         | OTX1     |

|           |          |
|-----------|----------|
| BPNT1     | PAQR4    |
| BRWD1     | PBK      |
| BTN3A3    | PFN2     |
| BTN3A3    | PHYHIPL  |
| C10orf118 | PLAGL2   |
| C15orf40  | PLEKHB2  |
| C1orf63   | SFT2D1   |
| C1QTNF3   | SLC2A3   |
| C5orf28   | SLC2A6   |
| CALD1     | TNFRSF21 |
| CAPRIN1   | VAV3     |
| CASP8     |          |
| CCL5      |          |
| CCNG2     |          |
| CCNT2     |          |
| CD109     |          |
| CD44      |          |
| CD47      |          |
| CDC23     |          |
| CDKN2B    |          |
| CENPL     |          |
| CEP57     |          |
| CEP68     |          |
| CFLAR     |          |
| CHD9      |          |
| CHM       |          |
| CHMP4C    |          |
| CLCC1     |          |
| CLINT1    |          |
| CLIP4     |          |
| CLOCK     |          |
| CNOT6     |          |
| COG5      |          |
| COL4A2    |          |
| COMMD2    |          |
| COPA      |          |
| CREB1     |          |
| CREB3L2   |          |
| CRIM1     |          |
| CRIP1     |          |



|         |
|---------|
| CYB5B   |
| DBF4    |
| DCDC2   |
| DDHD1   |
| DDX18   |
| DHX40   |
| DIP2A   |
| DIP2B   |
| DMTF1   |
| DNAJA2  |
| DNM1L   |
| DPY30   |
| DPY30   |
| DYRK2   |
| E2F3    |
| ECT2    |
| EEA1    |
| EGLN1   |
| EIF2AK4 |
| ELK3    |
| ENAH    |
| ERAP1   |
| ERAP2   |
| ERBB2IP |
| FAM102B |
| FAM134A |
| FAM73A  |
| FANCD2  |
| FBXO11  |
| FBXO31  |
| FBXO45  |
| FBXO6   |
| FCF1    |
| FCHO2   |
| FNBP1   |
| FPGT    |
| FZD6    |
| GATAD1  |
| GCLM    |
| GDAP1   |

|         |
|---------|
| GK5     |
| GMFB    |
| GNPTAB  |
| GNS     |
| GOLGA8A |
| GORASP2 |
| GPLD1   |
| GTPBP10 |
| GTPBP4  |
| HEG1    |
| HERPUD2 |
| HIF1A   |
| HN1     |
| HOOK3   |
| HOXA3   |
| HP1BP3  |
| IFIT5   |
| INPP5F  |
| INTS6   |
| INTS7   |
| IPO9    |
| IRAK1   |
| IRF9    |
| ITGA2   |
| ITPR2   |
| JAZF1   |
| JMY     |
| KBTBD6  |
| KCTD18  |
| KCTD20  |
| KIF11   |
| KLF9    |
| KLHL12  |
| KLHL20  |
| KLHL24  |
| KLHL28  |
| KLHL8   |
| KPNA2   |
| KPNA3   |
| LAMA3   |

|           |
|-----------|
| LAMC1     |
| LAMP2     |
| LAMP3     |
| LARS      |
| LEF1      |
| LPGAT1    |
| LYRM4     |
| LYSMD3    |
| LYST      |
| MAFF      |
| MAP3K1    |
| MAP3K2    |
| MAPK1IP1L |
| MAPK9     |
| MASTL     |
| MBD2      |
| MBNL3     |
| MCM3      |
| MCM4      |
| MCM6      |
| MED17     |
| MED23     |
| MGAT4A    |
| MGEA5     |
| MIB1      |
| MIER3     |
| MKLN1     |
| MKRN1     |
| MPP7      |
| MRS2      |
| MS4A7     |
| MTMR12    |
| MYO5A     |
| NFATC2IP  |
| NFYB      |
| NIN       |
| NMT2      |
| NR2C2     |
| NRCAM     |
| NRIP1     |

|           |
|-----------|
| NSL1      |
| NUFIP2    |
| NUP35     |
| NUP43     |
| NUPL1     |
| OLA1      |
| OSBPL8    |
| OSTM1     |
| PAN3      |
| PBK       |
| PCDH17    |
| PCGF5     |
| PHC3      |
| PHF20     |
| PHF20L1   |
| PHF6      |
| PHYHIPL   |
| PIK3R3    |
| PLXNA1    |
| POLE3     |
| POLK      |
| PTGER4    |
| PTGFRN    |
| PTK2      |
| PTPLAD1   |
| PURB      |
| QKI       |
| RAB10     |
| RAB11A    |
| RAB11FIP1 |
| RAB23     |
| RAB30     |
| RAB7L1    |
| RAB8B     |
| RAD23B    |
| RAP2C     |
| RB1       |
| RB1CC1    |
| RBBP5     |
| RBBP7     |

|          |
|----------|
| RBM12B   |
| RIT1     |
| RNASEL   |
| RNF141   |
| RNF38    |
| RNF6     |
| ROCK2    |
| RPL28    |
| RPS6KA3  |
| RRAGD    |
| RRP15    |
| RSAD2    |
| RSBN1    |
| RSF1     |
| RSL1D1   |
| RYBP     |
| SAC3D1   |
| SACS     |
| SAMD9L   |
| SCRN3    |
| SGK3     |
| SGTB     |
| SHANK2   |
| SHCBP1   |
| SLC30A10 |
| SLC35F5  |
| SLC7A11  |
| SLK      |
| SMAD2    |
| SMAD5    |
| SMNDC1   |
| SNRPE    |
| SNTB2    |
| SOCS5    |
| SOX4     |
| SPATS2   |
| SPOPL    |
| SQSTM1   |
| SRFBP1   |
| SRPK1    |

|          |
|----------|
| STC1     |
| STK4     |
| SUZ12    |
| SUZ12    |
| SWAP70   |
| SYNJ2    |
| TACC1    |
| TANC1    |
| TBX3     |
| TET3     |
| THEM4    |
| TIMM17A  |
| TIMM50   |
| TMED5    |
| TMEM64   |
| TMF1     |
| TMPO     |
| TNFRSF21 |
| TNKS2    |
| TNRC6A   |
| TOPORS   |
| TRIM33   |
| TRPS1    |
| TSNAX    |
| TTC33    |
| TTL      |
| UBE2B    |
| UBE2Q1   |
| UBE2Q2   |
| UBE2W    |
| UBR3     |
| UBR5     |
| UEVLD    |
| UHRF1BP1 |
| UNK      |
| UNKL     |
| UPF3A    |
| UQCRC1   |
| USP24    |
| USP3     |

|         |
|---------|
| USP42   |
| UXS1    |
| VASH2   |
| VPS13C  |
| VPS26A  |
| VPS35   |
| WAC     |
| WDR26   |
| WEE1    |
| WNK3    |
| XPR1    |
| YOD1    |
| YTHDF3  |
| YWHAZ   |
| ZBED3   |
| ZBTB11  |
| ZBTB33  |
| ZBTB41  |
| ZDHHC17 |
| ZFP36L2 |
| ZFP90   |
| ZKSCAN1 |
| ZMAT3   |
| ZNF12   |
| ZNF148  |
| ZNF292  |
| ZNF398  |
| ZNF512B |
| ZNF518A |
| ZNF652  |
| ZNF655  |
| ZNF766  |
| ZNF776  |
| ZNRF3   |

**B)**

|                        |
|------------------------|
| <b>Circadian genes</b> |
| CHD9                   |
| CREB1                  |
| CRY2                   |
| FBXW11                 |
| NAMPT                  |
| PPARA                  |
| PRKAB2                 |
| RORC                   |
| BTRC                   |
| CLOCK                  |
| CUL1                   |
| FBXL3                  |
| NPAS2                  |
| PER2                   |
| SERPINE1               |



**S14 Table.** Genes found functionally related to HULC by GeneDecks Partner Hunter analysis. In red the genes in common with the HepG2 1<sup>st</sup> order network (MDM2, MYC, and CDK1).

| Query for HULC |             |                                               |
|----------------|-------------|-----------------------------------------------|
| Rank           | Gene Symbol | Disorder (where 1 = hepatocellular carcinoma) |
| 1              | APC         | 1                                             |
| 2              | ASS1        | 1                                             |
| 3              | PML         | 1                                             |
| 4              | ITGAV       | 1                                             |
| 5              | SERPINA1    | 1                                             |
| 6              | ERBB3       | 1                                             |
| 7              | HLA-A       | 1                                             |
| 8              | GSTM1       | 1                                             |
| 9              | FGL1        | 1                                             |
| 10             | KRT8        | 1                                             |
| 11             | SEPP1       | 1                                             |
| 12             | GSTP1       | 1                                             |
| 13             | RHOA        | 1                                             |
| 14             | GDF15       | 1                                             |
| 15             | GHRL        | 1                                             |
| 16             | ITGA5       | 1                                             |
| 17             | ASGR2       | 1                                             |
| 18             | SLC2A2      | 1                                             |
| 19             | HLF         | 1                                             |
| 20             | PHF20       | 1                                             |
| 21             | RHOC        | 1                                             |
| 22             | RHOD        | 1                                             |
| 23             | FGF2        | 1                                             |
| 24             | HNF1B       | 1                                             |
| 25             | CEACAM6     | 1                                             |
| 26             | GSTT1       | 1                                             |
| 27             | ASPH        | 1                                             |
| 28             | APOD        | 1                                             |
| 29             | SPINT1      | 1                                             |
| 30             | FGF3        | 1                                             |
| 31             | XBP1        | 1                                             |
| 32             | FGFR1       | 1                                             |
| 33             | MDK         | 1                                             |
| 34             | FGFR4       | 1                                             |
| 35             | KRT14       | 1                                             |
| 36             | ITGA1       | 1                                             |
| 37             | CAPN2       | 1                                             |
| 38             | YBX3        | 1                                             |

|                |   |
|----------------|---|
| <b>39 MDM2</b> | 1 |
| 40 KLF6        | 1 |
| 41 E2F1        | 1 |
| 42 MTUS1       | 1 |
| 43 SLC25A47    | 1 |
| 44 F9          | 1 |
| 45 FGF1        | 1 |
| 46 CEACAM1     | 1 |
| 47 GSTA2       | 1 |
| 48 BRCA2       | 1 |
| 49 IL32        | 1 |
| 50 SLC17A5     | 1 |
| 51 KRAS        | 1 |
| 52 MKI67       | 1 |
| 53 CCR1        | 1 |
| 54 FGFR2       | 1 |
| 55 SPP1        | 1 |
| 56 PPARA       | 1 |
| 57 SCARB1      | 1 |
| 58 ARG1        | 1 |
| 59 HCCAT5      | 1 |
| <b>60 MYC</b>  | 1 |
| 61 KRT1        | 1 |
| 62 PPIG        | 1 |
| 63 PKM         | 1 |
| 64 SP1         | 1 |
| 65 IL1RAPL2    | 1 |
| 66 BIRC5       | 1 |
| 67 ILK         | 1 |
| 68 THRB        | 1 |
| 69 AHR         | 1 |
| 70 IL15        | 1 |
| 71 PINX1       | 1 |
| 72 BID         | 1 |
| 73 CEACAM7     | 1 |
| 74 CCL21       | 1 |
| 75 AHSG        | 1 |
| 76 FAS         | 1 |
| 77 H19         | 1 |
| 78 ERCC1       | 1 |
| 79 APOBEC1     | 1 |
| 80 TH          | 1 |
| 81 SLC2A1      | 1 |
| 82 GLUL        | 1 |
| 83 CD4         | 1 |
| 84 HCCAT3      | 1 |
| 85 HSPA4       | 1 |

|           |             |   |
|-----------|-------------|---|
| 86        | CDH13       | 1 |
| 87        | GCLC        | 1 |
| 88        | GLS         | 1 |
| 89        | HCRP1       | 1 |
| 90        | CD63        | 1 |
| 91        | CFLAR       | 1 |
| 92        | FAH         | 1 |
| <b>93</b> | <b>CDK1</b> | 1 |
| 94        | SERPINA7    | 1 |
| 95        | F2RL3       | 1 |
| 96        | F2RL2       | 1 |
| 97        | ARMC10      | 1 |
| 98        | FASN        | 1 |
| 99        | SLC25A13    | 1 |
| 100       | TPX2        | 1 |

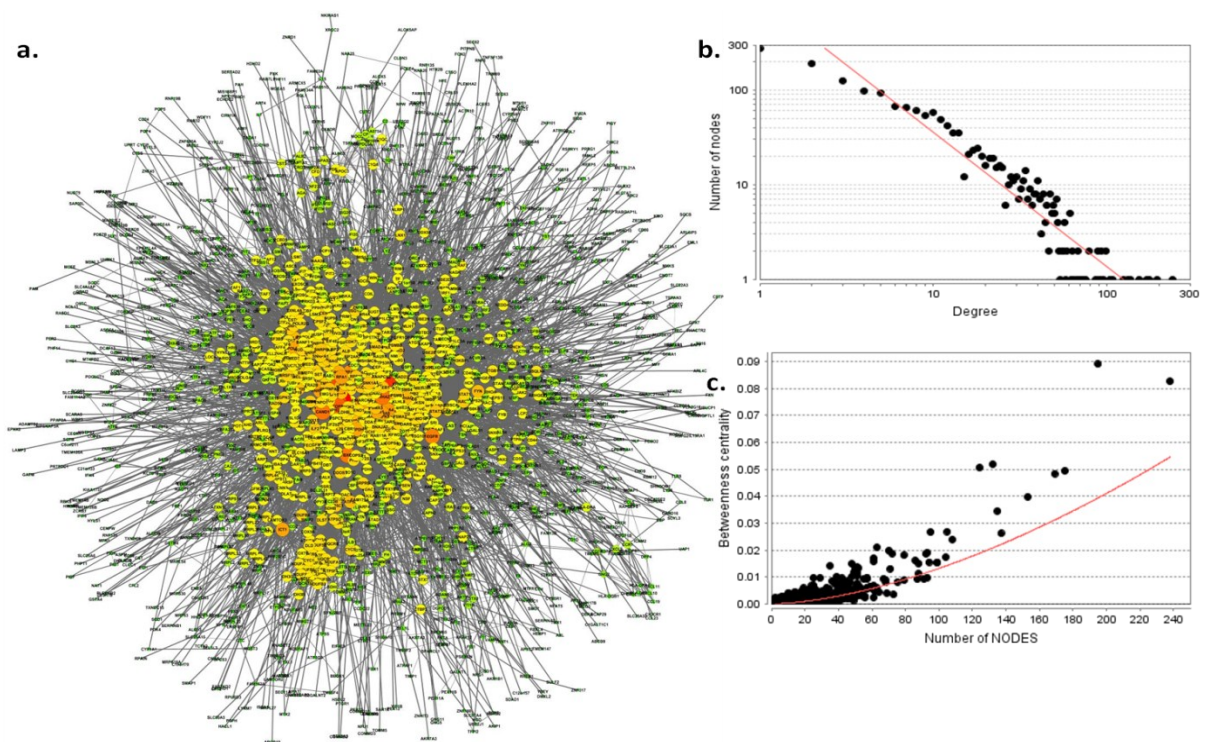

**S1 Fig.** a) HCV network. Red color shows the high degree of a node while yellow and green an intermediate and low degree, respectively. b) Degree distribution and c) Betweenness distribution.

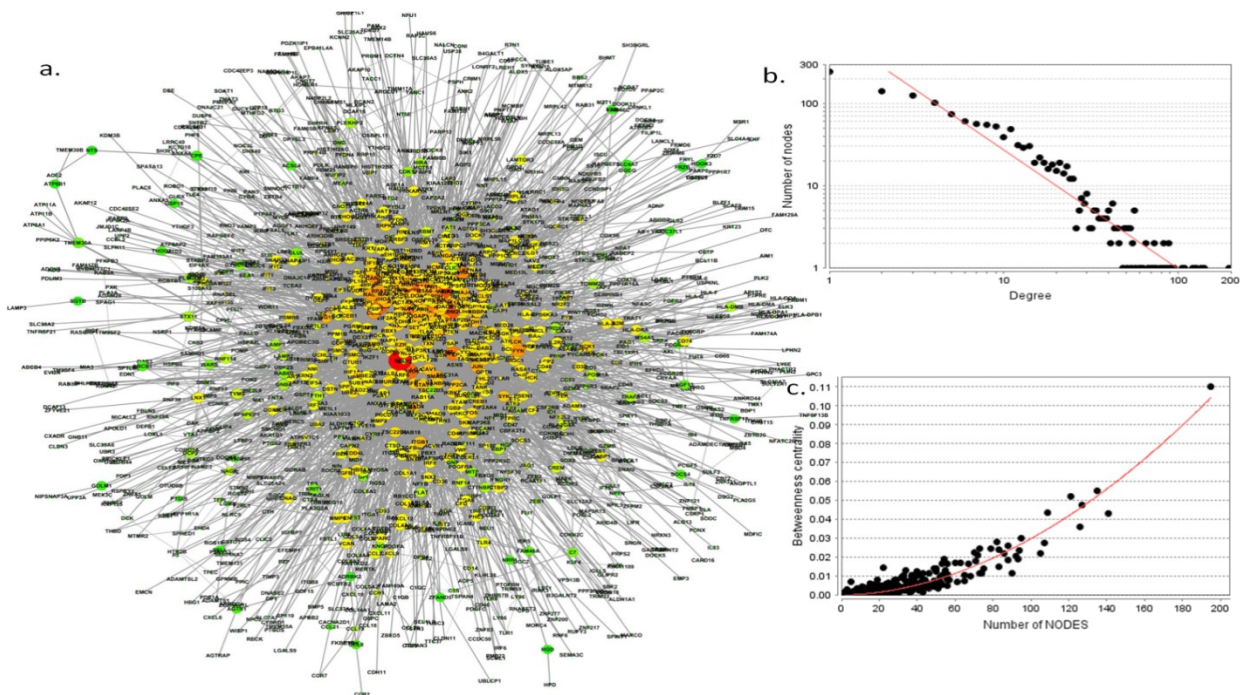

**S2 Fig.** a) HCV-related cirrhosis network. Red color shows the high degree of a node while yellow and green an intermediate and low degree, respectively. b) Degree distribution and c) Betweenness distribution.

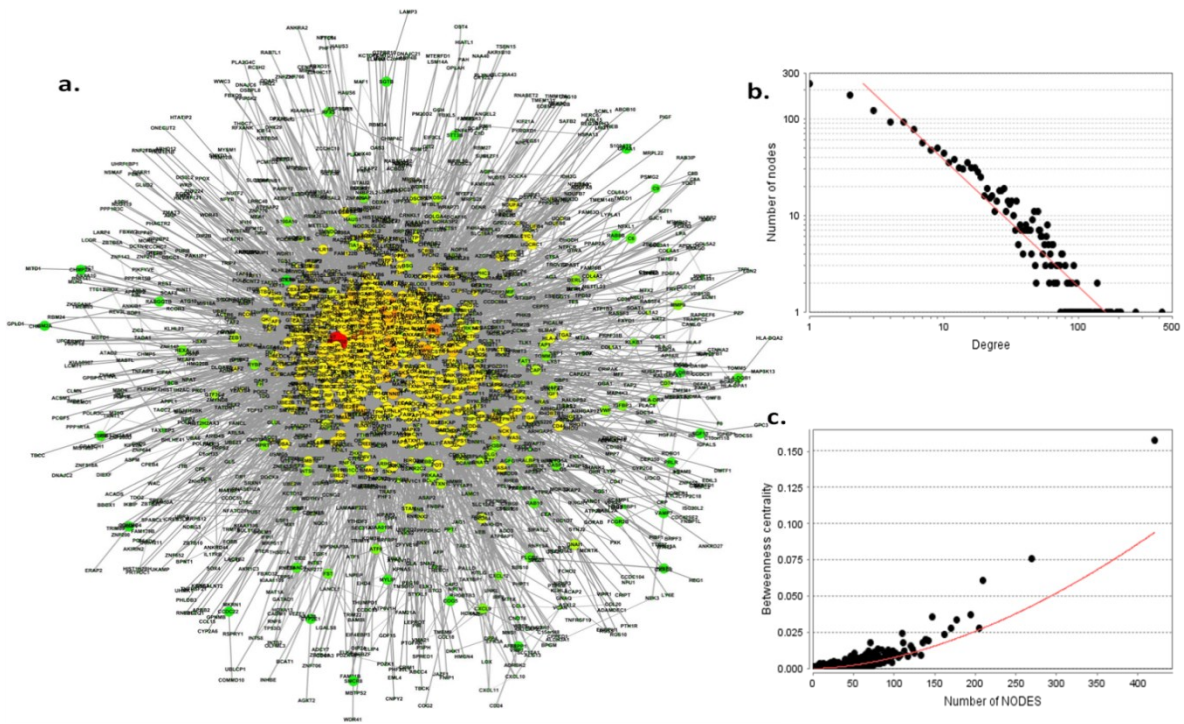

**S3 Fig.** a) HCC with HCV-related cirrhosis network. Red color shows the high degree of a node while yellow and green an intermediate and low degree, respectively. b) Degree distribution and c) Betweenness distribution.

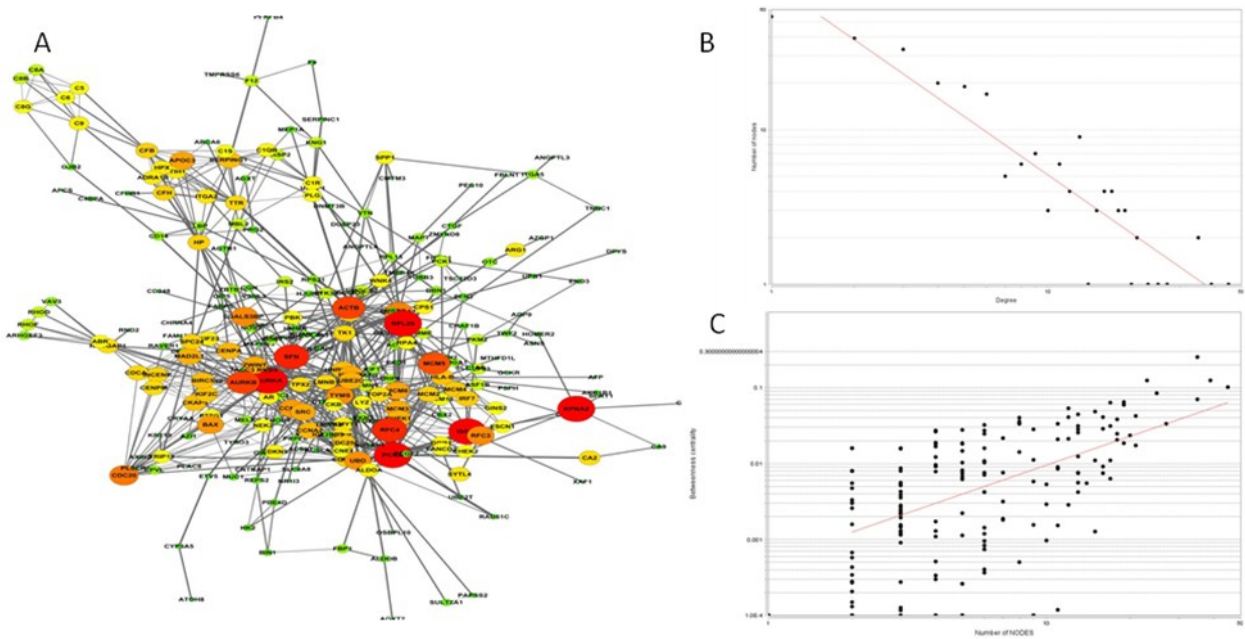

**S4 Fig.** A) HepG2 network. The red color shows high degree nodes while yellow and green colors an intermediate and low degree, respectively. B) Degree distribution and C) Betweenness distribution.

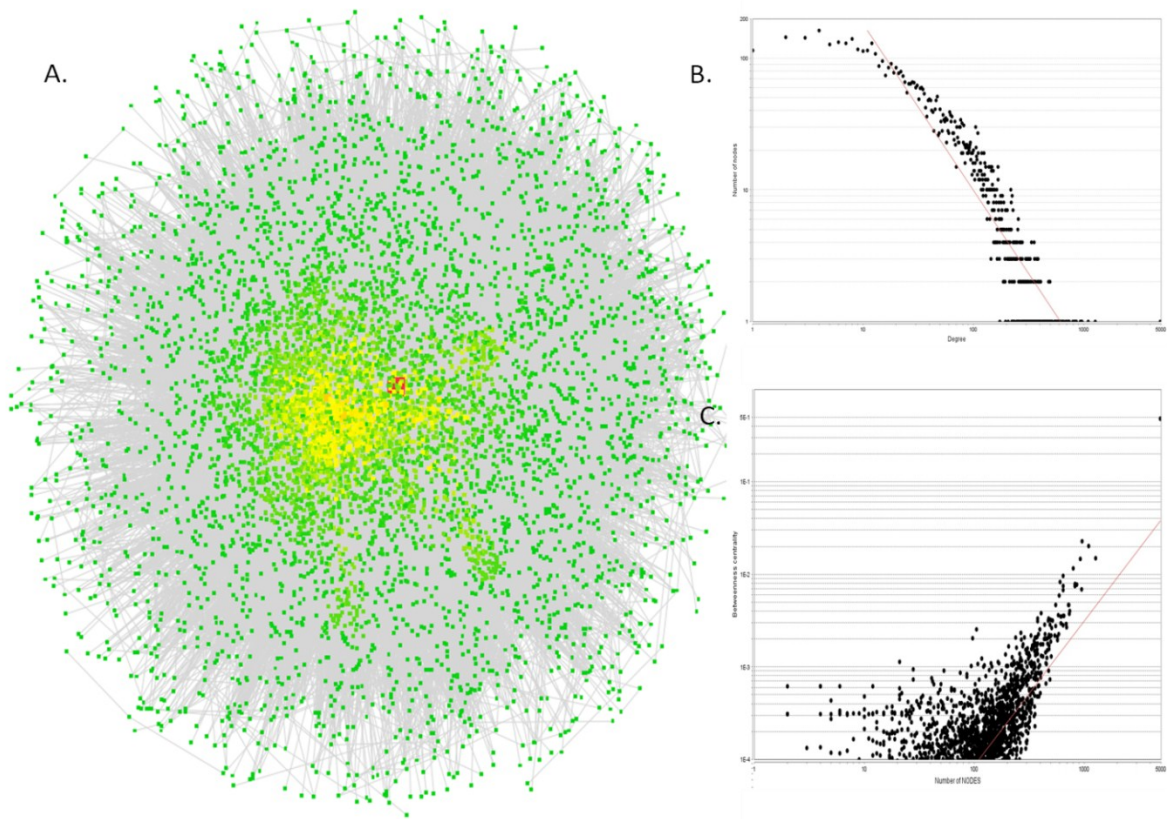

**S5 Fig.** A) HepG2 first order network. Red color shows the high degree nodes while yellow and green intermediate and low degree, respectively. B) Degree distribution and C) Betweenness distribution.
